# Supplementary material for: Electrochemical synthesis of poly(3-aminophenylboronic acid) in ethylene glycol without exogenous protons
Source: Royal Society of Chemistry journal article supplement (doi:10.1039/c6cp00800c), 2016-01-01
Supplement: c6cp00800c1.pdf [file c6cp00800c1.pdf]

## Supporting Information

### **Electrochemical synthesis of poly (3-aminophenylboronic acid) in ethylene glycol without exogenous protons**

Feifan Wang,<sup>a</sup> Feixue Zou,<sup>a</sup> Xinxin Yu,<sup>a</sup> Zhenyu Feng,<sup>a</sup> Na Du,<sup>a</sup> Yaohua

Zhong<sup>b</sup> and Xirong Huang<sup>\*a, b</sup>

<sup>a</sup>Key Laboratory of Colloid and Interface Chemistry of the Education Ministry of China, Shandong University, Jinan 250100, China

<sup>b</sup>State Key Laboratory of Microbial Technology of China, Shandong University, Jinan 250100, China

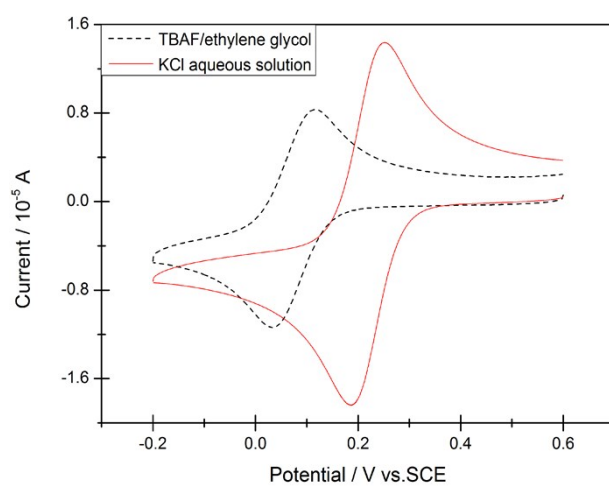

**Fig. S1.** Cyclic voltammograms of 1 mM  $K_3[Fe(CN)_6]$  in 0.5 M KCl aqueous solution or 200 mM TBAF in ethylene glycol. The working, counter and reference electrodes are GCE, Pt wire, and SCE, respectively. The scan rate is  $100 \text{ mV} \cdot \text{s}^{-1}$ .

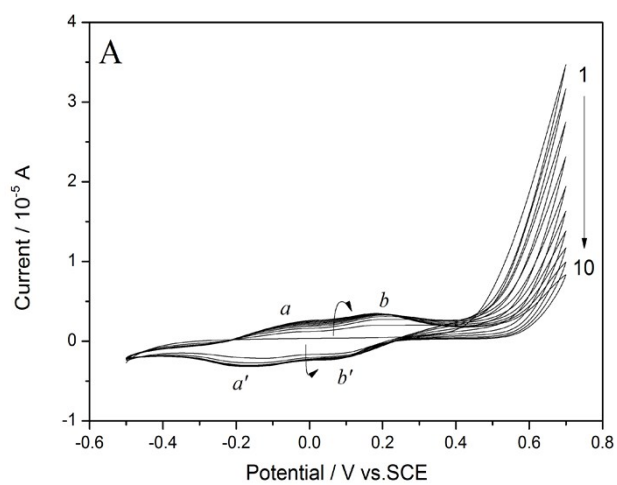

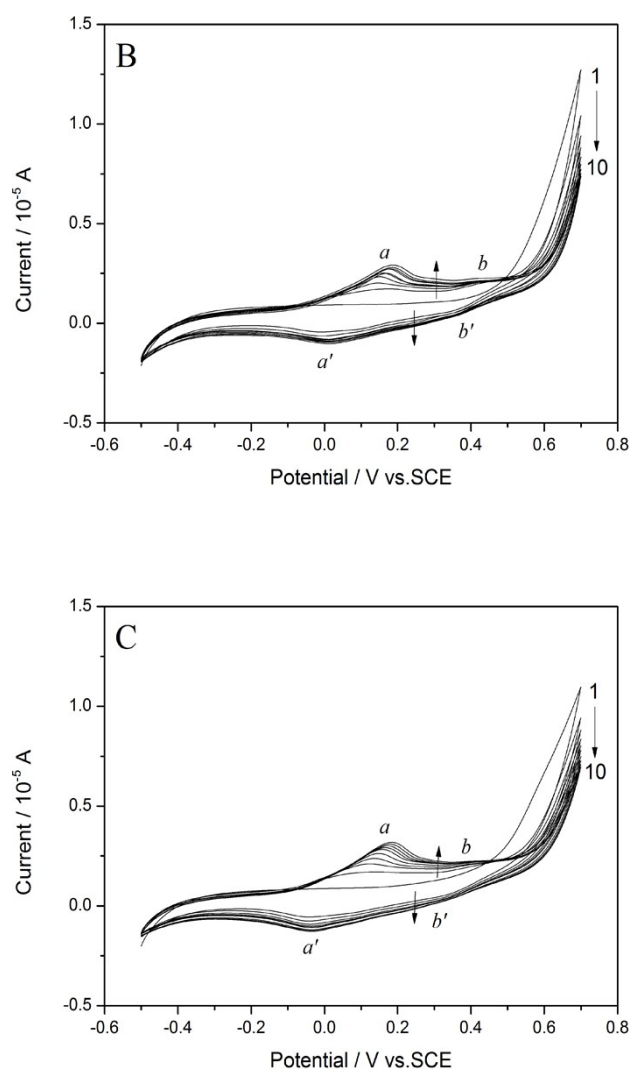

**Fig. S2.** Cyclic voltammograms (10 cycles) of the APBA electropolymerization in TBAF (100 mM)/ethylene glycol (A), TBACl (100 mM)/ethylene glycol (B), and TBABF<sub>4</sub> (100 mM)/ethylene glycol (C). The working electrode is GCE. The potential window is over -0.5 ~ 0.7 V. The scan rate is 50 mV·s<sup>-1</sup>.
